# Supplementary material for: In silico MS/MS spectra for identifying unknowns: a critical examination using CFM-ID algorithms and ENTACT mixture samples
Source: PubMed Central journal article supplement (PMC7021669; doi:10.1007/s00216-019-02351-7), 2020-01-22
Supplement: 216_2019_2351_MOESM1_ESM.pdf [file 216_2019_2351_MOESM1_ESM.pdf]

## **Analytical and Bioanalytical Chemistry**

### **Electronic Supplementary Material**

#### **In silico MS/MS spectra for identifying unknowns: a critical examination using CFM-ID algorithms and ENTACT mixture samples**

Alex Chao, Hussein Al-Ghoul, Andrew D. McEachran, Ilya Balabin, Tom Transue, Tommy Cathey, Jarod N. Grossman, Randolph Singh, Elin M. Ulrich, Antony J. Williams, Jon R. Sobus

Additional files available under [10.1007/s00216-019-02351-7](https://doi.org/10.1007/s00216-019-02351-7)
